# Supplementary material for: TAZ is required for chondrogenesis and skeletal development
Source: PubMed Central journal article supplement (PMC8058044; doi:10.1038/s41421-021-00254-5), 2021-04-20
Supplement: 41421_2021_254_MOESM1_ESM.pdf [file 41421_2021_254_MOESM1_ESM.pdf]

1 **Supplementary information, Figure legends**

2 **Fig. S1. TAZ expression is gradually increased during chondrogenic differentiation.** **a**  
3 Micromass culture. The chondroprogenitor cells from the wild-type embryos at E15.5 were  
4 cultured as indicated time and stained with Alcian blue and Safranin O solution. **b** qRT-PCR  
5 analysis of the chondrocyte differentiation markers of micromass culture from (**a**). Expression  
6 values were normalized to GAPDH as control. Error bars were the means  $\pm$  standard error of  
7 the mean (SEM) of triplicates from a representative experiment. \* $P < 0.05$ , \*\* $P < 0.01$ .

8  
9 **Fig. S2. TAZ expression** **a, b** qRT-PCR and western blot analysis using primary chondrocytes  
10 isolated from the Col2-Cre;TAZ<sup>f/f</sup> mice and controls at P1. **c, d** qRT-PCR and western blot  
11 analysis using cortical bone from the Col2-Cre;TAZ<sup>f/f</sup> mice and controls at 1 month. Error bars  
12 were the means  $\pm$  standard error of the mean (SEM) of triplicates from a representative  
13 experiment. \*\* $P < 0.01$ .

14  
15 **Fig. S3. Deletion of TAZ in chondrocytes inhibits growth plate and articular cartilage**  
16 **development.** **a** Histological sections of articular cartilage from Col2-Cre;TAZ<sup>f/f</sup> mice and  
17 controls at 4 months by Safranin O staining. **b** qRT-PCR analysis of Col10a1 expression using  
18 the articular cartilage from the Col2-Cre;TAZ<sup>f/f</sup> mice and controls at 1, 2 and 4 months. Error  
19 bars were the means  $\pm$  standard error of the mean (SEM) of triplicates from a representative  
20 experiment. \* $P < 0.05$ .

21  
22 **Fig. S4. TAZ is required for chondroprogenitor cell proliferation.** **a** qRT-PCR analysis  
23 using RNA from primary chondrocytes with shTAZ lentivirus. Expression values were  
24 normalized to GAPDH as control. **b, c** Gene expression analysis in Sox5-depleted chondrocytes.  
25 **d, e** qRT-PCR analysis from silenced- or overexpressed-TAZ transduced chondrocytes and  
26 controls. The experiment was independently repeated for three times. Error bars were the means  
27  $\pm$  standard error of the mean (SEM) of triplicates from a representative experiment. \*\* $P < 0.01$ .

28  
29 **Fig. S5 TAZ regulates Sox5 expression in chondrocytes.** **a, b, d** Quantification of Fig. 6g  
30 and Fig. 7h, normalized to GAPDH. **c** qRT-PCR analysis of *TEAD1* expression after  
31 knockdown of *TEAD1*. Error bars were the means  $\pm$  standard error of the mean (SEM) of  
32 triplicates from a representative experiment. \*\* $P < 0.01$ .

33  
34 **Fig. S6 TAZ expression in callus chondrocytes.** qRT-PCR analysis of *TAZ* expression in  
35 callus chondrocytes in Col2-Cre;TAZ<sup>f/f</sup> mice and controls. Error bars were the means  $\pm$  standard

1 error of the mean (SEM) of triplicates from a representative experiment. \*\* $P < 0.01$ .

- 2
- 3
- 4
- 5
- 6
- 7
- 8
- 9
- 10
- 11
- 12
- 13
- 14
- 15
- 16
- 17
- 18
- 19
- 20
- 21
- 22
- 23
- 24
- 25
- 26
- 27
- 28
- 29
- 30
- 31
- 32
- 33
- 34
- 35
- 36

1 **Fig. S1**

2

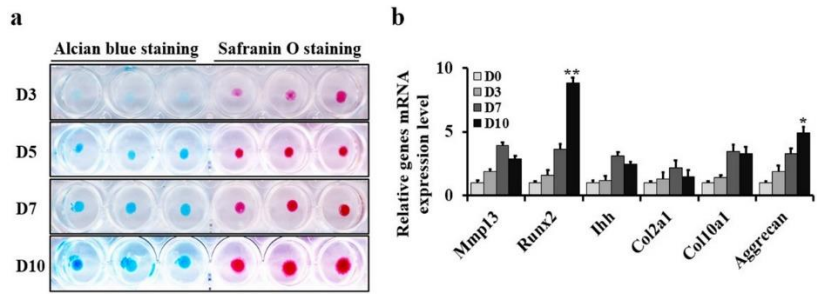

3

4

5

6

7

8

9

10

11

12

13

14

15

16

17

18

19

20

21

22

23

24

25

1 Fig. S2

2

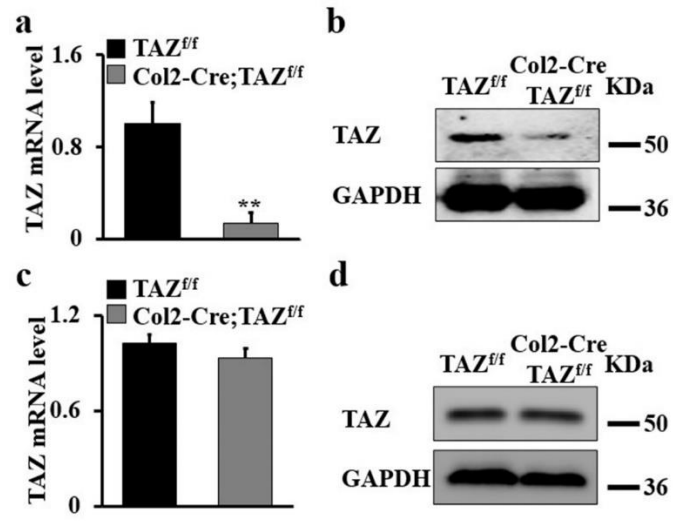

3

4

5

6

7

8

9

10

11

12

13

14

15

16

17

18

19

20

21

22

Fig S3

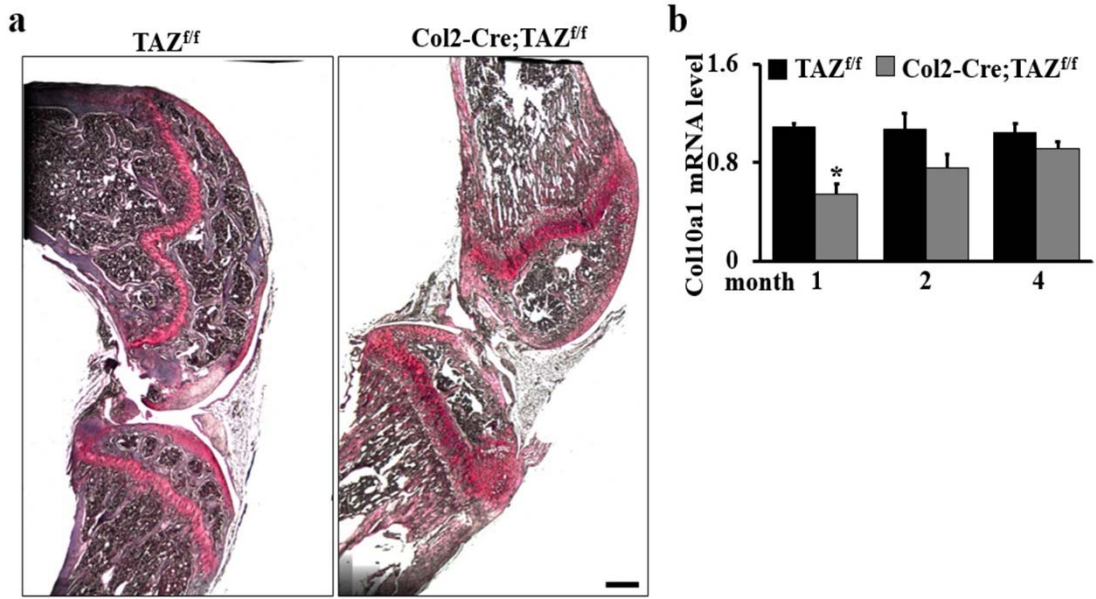

1 **Fig. S4**

2

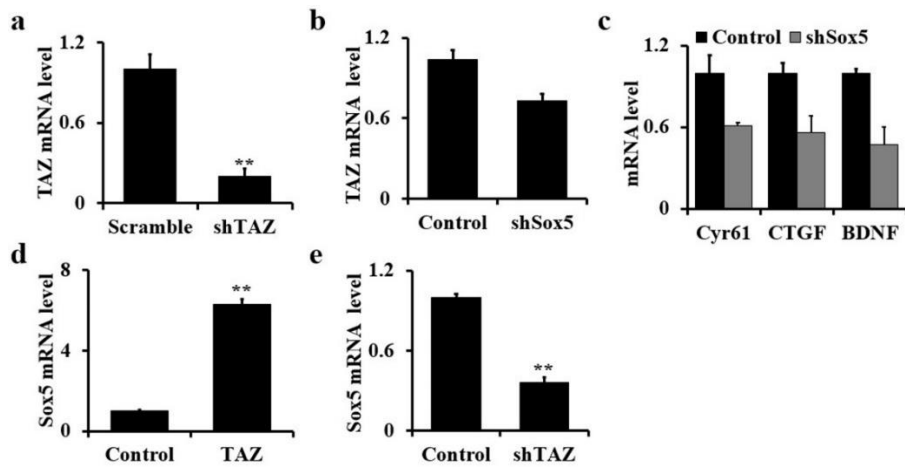

3

4

5

6

7

8

9

10

11

12

13

14

15

16

17

18

19

20

21

22

23

1 Fig. S5

2

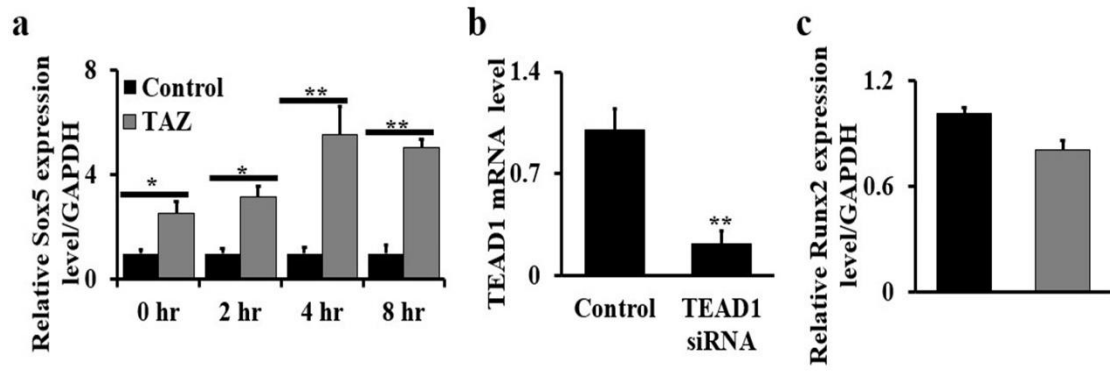

3

4

5

6

7

8

9

10

11

12

13

14

15

16

17

18

19

20

21

22

23

24

1 **Fig. S6**

2

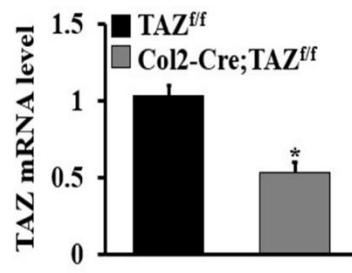

3

4

5

6

7

8

9

10

11

12

13

14

15

16

17

18

19

20

21

22

23

24

25

26



1 **Supplementary Table S1**

| <b>Gene</b> | <b>sequence (5'-3')</b>   | <b>Gene</b> | <b>sequence (5'-3')</b>    |
|-------------|---------------------------|-------------|----------------------------|
| GAPDH-F     | CCTGGTCACCAGGGCTGCCATT    | Runx2       | GCCGCAGTGCCCCGATTGAG       |
| GAPDH-R     | CGTTGAATTTGCCGTGAGTGGAG   | Runx2       | GTCGGTGCCGACCAGTTCGG       |
| TAZ-F       | GCAGACATCTGCTTCACCAA      | Pthlh-F     | TGGAGTGTCTGGTATTCTCTGC     |
| TAZ-R       | TTCCCTTCTGGGAAGATGTG      | Pthlh-R     | ACACAGCGCGTTTGAGCCTG       |
| TEAD1-F     | CCAGATACATCAAACCTCAGGACGG | Runx3-F     | CTCCTTCCCAACTATACACCAACC   |
| TEAD1-R     | GGCGGCTTGAATTTCTCGAACT    | Runx3-R     | TGTTCTCGCCCATCTTGCCG       |
| CTGF-F      | GTCTGCGCCAAGCAGCTGGGAGAAC | Col10a1-F   | GGGATTCCAGTAAGAGGAGAACAAGG |
| CTGF-R      | GCAGTGCACACTCCGATCTTGCG   | Col10a1-R   | TCCATAGCCTGGCTTGCTG        |
| Cyr61-F     | GCCCTCTGGAGGCACCCAAGTGC   | Aggrecan-F  | CTAGGGTCTTCCCTCACCATCCCC   |
| Cyr61-R     | GGTCGCAGGGCTGAGTTTTGCTG   | Aggrecan-R  | CACTTGATTCTTGGGGTGAGGG     |
| Sox5-F      | GCAGACAGAAAGTGGAAGAGGAGG  | Col9a1-F    | AGTGAAGTGTGTCCAAGATCAGG    |
| Sox5-R      | GGCTGAAATTCCTCAGAGTGAGG   | Col9a1-R    | GTCCTTCGAGATGCAGCCTTC      |
| Ihh-F       | CGGCCCCGACTGCGGTTCTGTCT   | Col2a1-F    | AGGATGTATGGAAGCCCTCATCTTGC |
| Ihh-R       | ACGAGCTTGCGAGGCGGCCT      | Col2a1-R    | GGGTTGAGGCAGTCTGGGTCTT     |
| BDNF-F      | GACTCTGGAGAGCGTGAATGGG    | Mmp13-F     | TCATACTACCATCCTGCGACTCTTGC |
| BDNF-R      | GCAGCTCTTCGATGACGTGC      | Mmp13-R     | GCCAGTCACCTTAAGCCAAAGAAAG  |

2

3

4

5

6

7
